# Supplementary material for: Wastewater Surveillance of SARS-CoV-2 across 40 U.S. states
Source: PubMed Central journal article supplement — medRxiv. 2021 Mar 14:2021.03.10.21253235. Preprint. [Version 2] doi: 10.1101/2021.03.10.21253235 (PMC7987047; doi:10.1101/2021.03.10.21253235), 2021-03-14
Supplement: NIHPP2021.03.10.21253235-supplement-1.pdf [file NIHPP2021.03.10.21253235-supplement-1.pdf]

536  
537  
538  
539  
540  
541  
542

### Supplemental figures

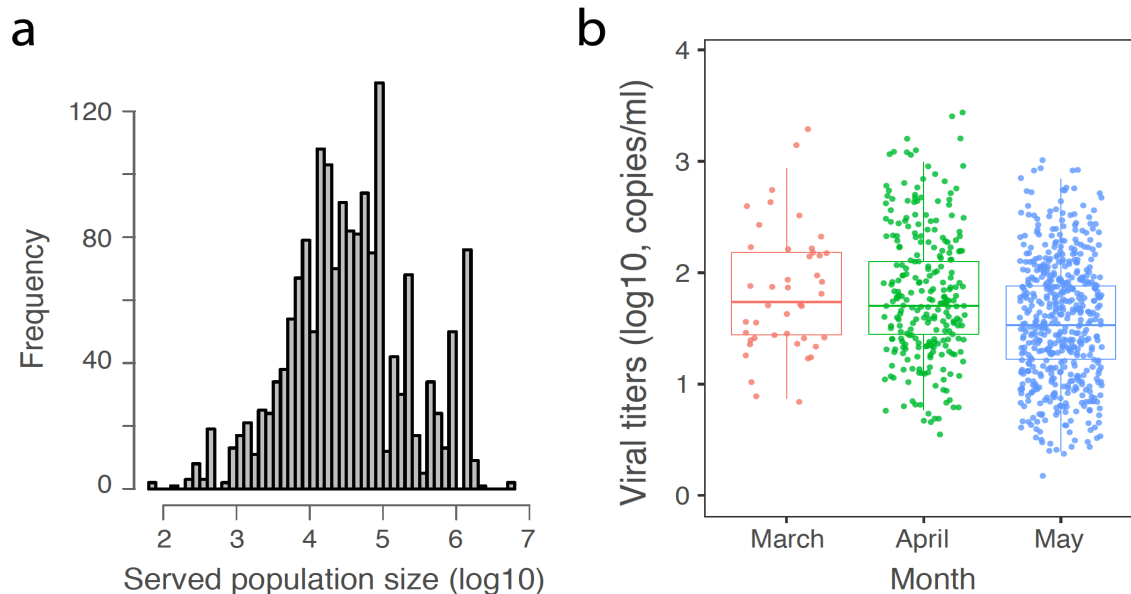

543  
544  
545  
546  
547  
548  
549  
550  
551  
552  
553  
554

**Fig. S1.** Distribution of the wastewater treatment plant serving population size, and viral titers in positive wastewater samples by month. (a) Histogram of population sizes served by the sampled wastewater treatment plants. The median served population size is 31,745. (b) Viral titers in positive wastewater samples by month. The box represents the interquartile range of viral titers for each month, the horizontal line inside the box is the median. Significant difference was found between the mean viral titers in April and May (Welch's t-test, p-value = 0.025).

555  
556  
557  
558  
559  
560  
561

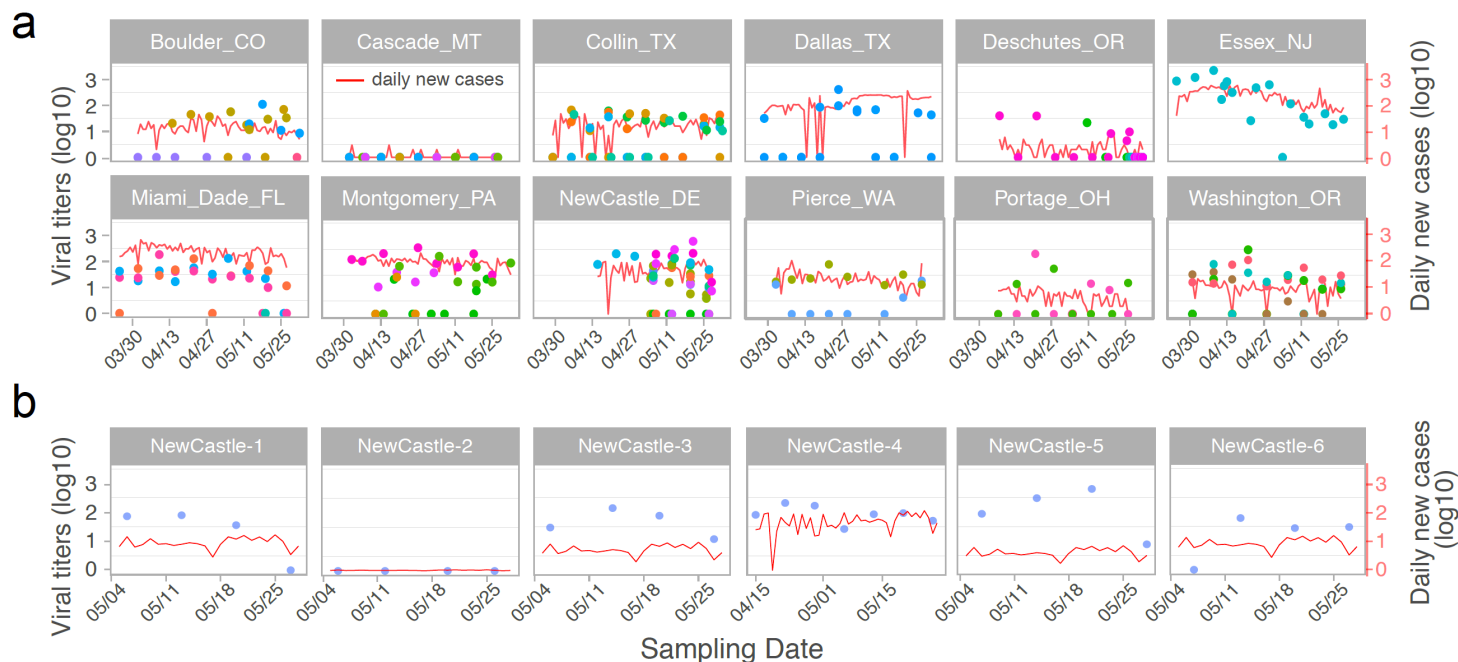

563  
564  
565  
566  
567  
568  
569  
570  
571  
572  
573  
574  
575  
576  
577  
578

**Fig. S2.** Temporal SARS-CoV-2 titers at the county level and catchment level. (a) Temporal viral titers in 12 representative counties. Each dot is a sample, and colored by the sampling catchments in the county. Red lines represent the daily new cases in the corresponding counties during the sampling period. (b) Temporal viral titers for samples collected in six different locations in the New Castle County of Delaware. Red lines represent the weighted daily new cases (daily new cases in the county multiplying the catchment served population size and divided by the county population size) during the sampling period.

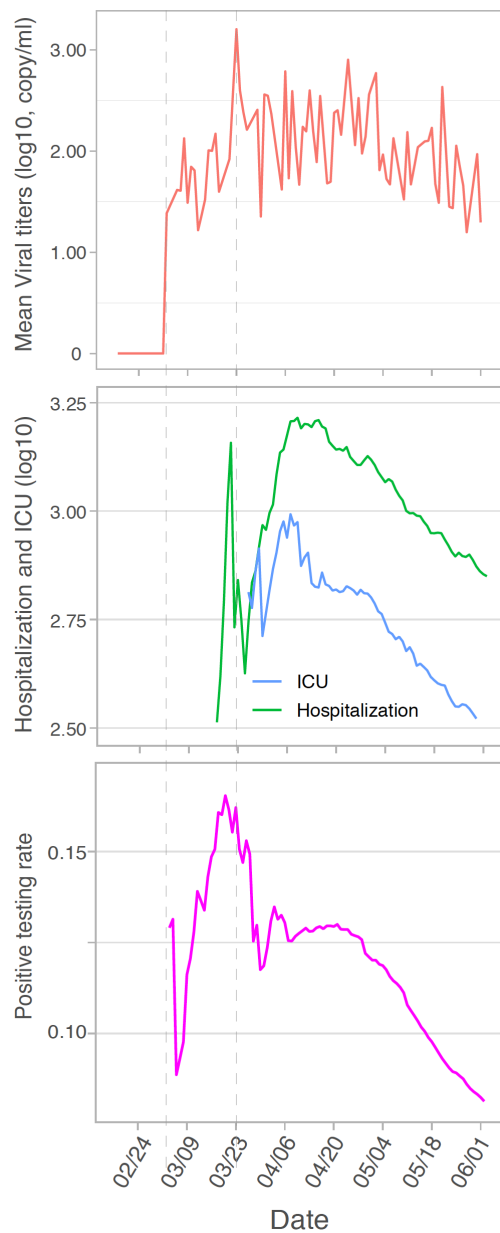

579  
580 **Fig. S3.** Wastewater viral titers (top) and clinical COVID-19 surveillance  
581 indicators including hospitalization and intensive care unit admissions (middle),  
582 and the testing positive rates (bottom) from February to June. Positive  
583 wastewater data from all the sampling locations were aggregated by date using  
584 the mean function. Clinical data from the 40 sampled states were aggregated in  
585 the same way.  
586  
587  
588

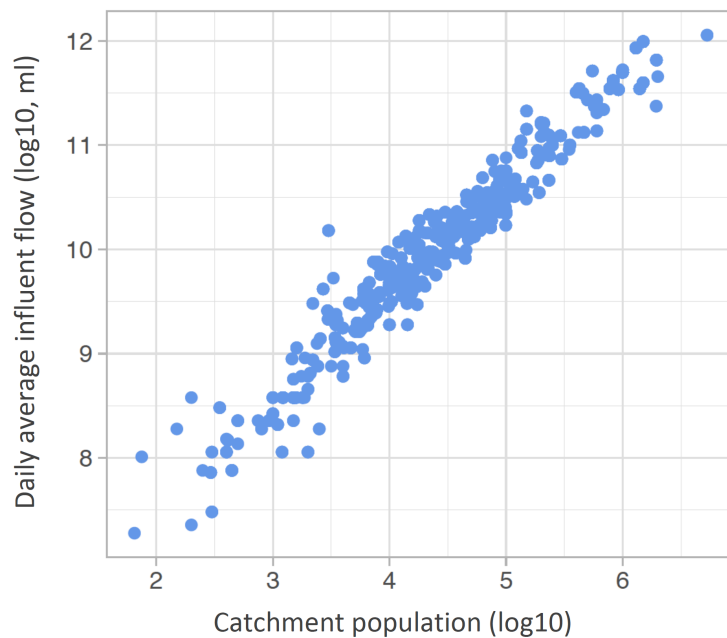

589  
590  
591  
592  
593  
594  
595

**Fig. S4.** Daily average influent flow at the wastewater treatment plant is correlated with catchment population size.

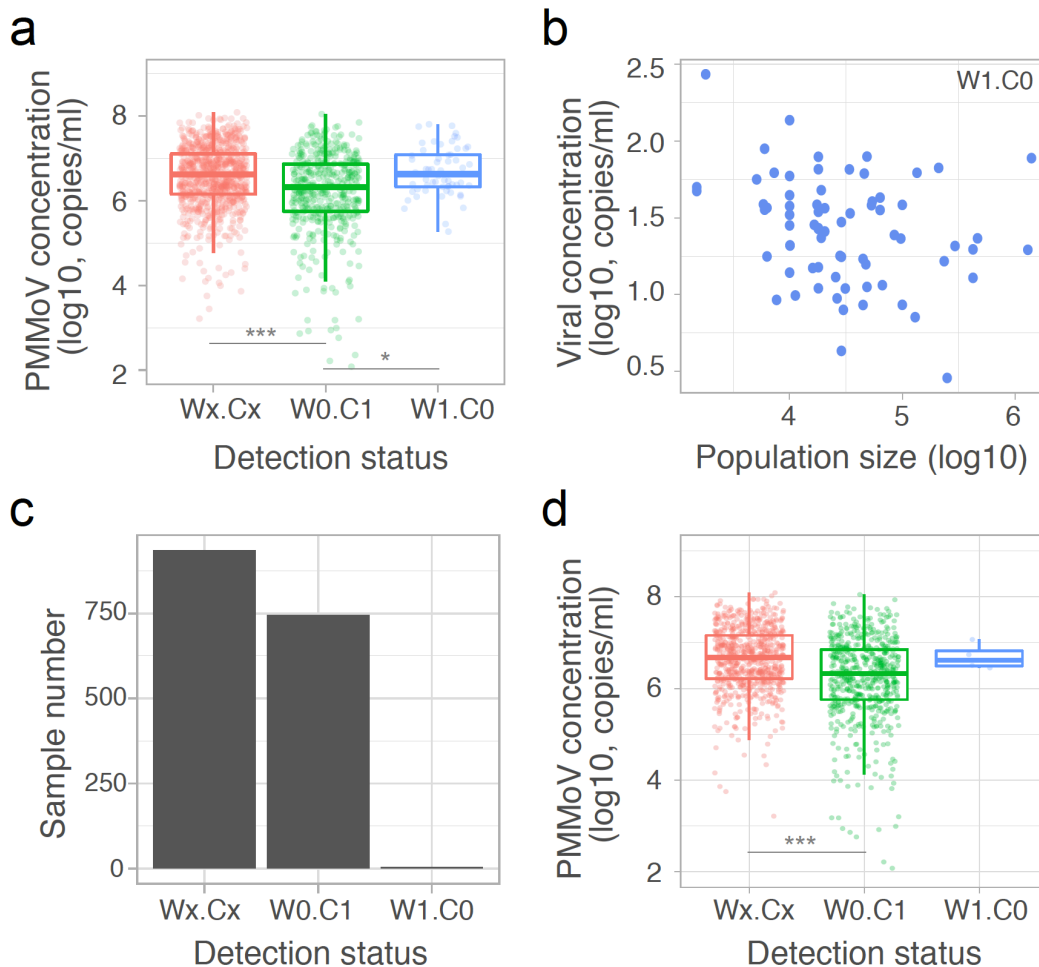

596  
597

598 **Fig. S5.** PMMoV concentrations in wastewater samples, and detection status  
599 with 7-day averages of new COVID-19 cases. (a) PMMoV concentrations in the  
600 Wx.Cx (x = 0 or 1), W0.C1, and W1.C0 groups. W1.C1: SARS-CoV-2 detected in  
601 Wastewater and new Clinical cases reported; W0.C0: no Wastewater detection  
602 and no new Clinical cases reported; W0.C1: no Wastewater detection but new  
603 Clinical cases reported; W1.C0: Wastewater detection but no new Clinical cases  
604 reported. Significant differences of PMMoV concentrations were found between  
605 W0.C1 and Wx.Cx or W1.C0 groups (Welch's t-test, and symbol \*: p-value <  
606 0.05; \*\*\*: p-value < 0.001). (b) Viral titers and the served population size for the  
607 W1.C0 samples. Most of these samples were from catchments serving 10,000 ~  
608 100,000 population, with viral titers ranging from 10 to 100 copies per ml of  
609 wastewater. (c-d) Detection status for wastewater data against 7-day averages of  
610 new clinical cases (c), and PMMoV concentrations in the Wx.Cx, W0.C1, and  
611 W1.C0 groups (d). Significant difference was found between Wx.Cx and W0.C1  
612 groups (Welch's t-test, and symbol \*\*\*: p-value < 0.001).
